# Supplementary material for: NeuralPolish: a novel Nanopore polishing method based on alignment matrix construction and orthogonal Bi-GRU Networks
Source: Oxford University Press journal article supplement (doi:10.1093/bioinformatics/btab354), 2021-05-06
Supplement: btab354_supplementary_data.pdf [file btab354_supplementary_data.pdf]

## Supplementary Materials

### Supplementary Tables

**Table S1.** Data sets information

| Data set                                                 | Accession                                                                                                                         | Basecaller | Coverage |
|----------------------------------------------------------|-----------------------------------------------------------------------------------------------------------------------------------|------------|----------|
| Escherichia coli K12 - ONT                               | <a href="http://lab.loman.net/2016/07/30/nanopore-r9-data-release/">http://lab.loman.net/2016/07/30/nanopore-r9-data-release/</a> | Guppy      | 319X     |
| Escherichia coli str. K-12 substr. MG1655 - Ground Truth | GenBank NC_0913                                                                                                                   |            |          |
| Saccharomyces cerevisiae w303 - ONT                      | <a href="http://www.tgsbioinformatics.com/necat/">http://www.tgsbioinformatics.com/necat/</a>                                     | Albacore   | 512X     |
| Saccharomyces cerevisiae S288c - Ground Truth            | GenBank GCA_00146045.2                                                                                                            |            |          |
| NA12878 Chromosome 21 - ONT                              | <a href="https://github.com/nanopore-wgs-consortium/NA12878/">https://github.com/nanopore-wgs-consortium/NA12878/</a>             | Albacore   | 35X      |
| GrCH38-with-decoys - Ground Truth                        | <a href="https://github.com/nanopore-wgs-consortium/NA12878/">https://github.com/nanopore-wgs-consortium/NA12878/</a>             |            |          |
| NA12878 Chromosome 20 - ONT                              | <a href="https://github.com/nanopore-wgs-consortium/NA12878/">https://github.com/nanopore-wgs-consortium/NA12878/</a>             | Albacore   | 35X      |
| GrCH38-with-decoys - Ground Truth                        | <a href="https://github.com/nanopore-wgs-consortium/NA12878/">https://github.com/nanopore-wgs-consortium/NA12878/</a>             |            |          |
| Arabidopsis thaliana - ONT                               | ENA PRJEB21270                                                                                                                    | Albacore   | 30X      |
| Arabidopsis thaliana assembly TAIR10.1 - Ground Truth    | GenBank GCA_00001735.2                                                                                                            |            |          |

**Table S2.** Comparison of the error rates of polishing results by Racon, Medaka, MarginPolish, HELEN and NeuralPolish on the data assembled by Canu.

| dataset              | tools        | mismatch(%) | deletion(%) | insertion(%) | total error rate(%) |
|----------------------|--------------|-------------|-------------|--------------|---------------------|
| <i>E. coli</i>       | Canu         | 0.10        | 0.31        | <b>0.02</b>  | 0.43                |
|                      | Racon        | 0.11        | 0.18        | 0.13         | 0.42                |
|                      | Medaka       | 0.14        | <b>0.05</b> | 0.09         | 0.28                |
|                      | MarginPolish | 0.12        | 0.11        | 0.13         | 0.36                |
|                      | HELEN        | 0.13        | 0.21        | 0.11         | 0.45                |
|                      | NeuralPolish | <b>0.06</b> | 0.11        | 0.07         | <b>0.24</b>         |
| <i>S. cerevisiae</i> | Canu         | <b>0.10</b> | 1.02        | <b>0.34</b>  | 1.46                |
|                      | Racon        | 0.12        | 0.71        | 0.52         | 1.35                |
|                      | Medaka       | 0.11        | <b>0.51</b> | 0.40         | <b>1.02</b>         |
|                      | MarginPolish | 0.14        | 0.64        | 0.50         | 1.27                |
|                      | HELEN        | 0.17        | 0.86        | 0.45         | 1.48                |
|                      | NeuralPolish | 0.12        | 0.62        | 0.64         | 1.38                |
| <i>NA12878 chr21</i> | Canu         | <b>0.27</b> | 4.83        | <b>0.17</b>  | 5.27                |
|                      | Racon        | 0.30        | 2.91        | 0.29         | 3.50                |
|                      | Medaka       | 0.36        | 2.55        | 0.26         | 3.17                |
|                      | MarginPolish | 0.32        | 2.87        | 0.27         | 3.46                |
|                      | HELEN        | 1.55        | 9.14        | 0.83         | 11.52               |
|                      | NeuralPolish | 0.32        | <b>1.61</b> | 0.45         | <b>2.38</b>         |
| <i>NA12878 chr20</i> | Canu         | 0.30        | 5.17        | <b>0.16</b>  | 5.63                |
|                      | Racon        | <b>0.29</b> | 3.00        | 0.25         | 3.54                |
|                      | Medaka       | 0.37        | 2.63        | 0.23         | 3.23                |
|                      | MarginPolish | 0.32        | 3.03        | 0.25         | 3.59                |
|                      | HELEN        | 1.66        | 9.67        | 0.85         | 12.18               |
|                      | NeuralPolish | 0.34        | <b>1.73</b> | 0.37         | <b>2.44</b>         |
| <i>A. thaliana</i>   | Canu         | <b>0.62</b> | 5.35        | <b>1.65</b>  | 7.62                |
|                      | Racon        | 0.65        | 3.79        | 1.86         | 6.30                |
|                      | Medaka       | 0.66        | 3.47        | 1.88         | 6.01                |
|                      | MarginPolish | 0.68        | 4.00        | 1.79         | 6.47                |
|                      | HELEN        | 1.06        | 5.21        | 1.89         | 8.16                |
|                      | NeuralPolish | 0.69        | <b>3.09</b> | 2.10         | <b>5.88</b>         |

**Table S3.** Quast evaluation of polishing results by Racon, Medaka, MarginPolish, HELEN and NeuralPolish on the data assembled by Flye.

| dataset                        | tools         | N50<br>(Mb) | mismatches<br>per 100kbp | indels<br>per 100kbp | number of<br>indels>5bp | genome<br>fraction(%) | Identity<br>(%) |
|--------------------------------|---------------|-------------|--------------------------|----------------------|-------------------------|-----------------------|-----------------|
| <i>E. coli</i>                 | Flye          | 4.6         | 182.31                   | 130.32               | <b>0</b>                | <b>99.998</b>         | 99.69           |
|                                | Racon         | 4.6         | 109.86                   | 204.66               | 49                      | 99.994                | 99.62           |
|                                | Medaka        | 4.6         | 135.11                   | <b>111.84</b>        | 1                       | 99.994                | 99.76           |
|                                | MarginPolish  | 4.6         | 106.36                   | 147.44               | 5                       | 99.959                | 99.73           |
|                                | HELEN         | 4.6         | 93.82                    | 158.56               | 16                      | 99.959                | 99.71           |
|                                | NeuralPolish  | 4.6         | <b>67.56</b>             | 126.08               | 2                       | 99.965                | <b>99.79</b>    |
| <i>S. cerevisiae</i>           | Flye          | 0.8         | 95.68                    | 274.38               | 313                     | 93.045                | 99.65           |
|                                | Racon         | 0.8         | 141.06                   | 348.03               | 503                     | 92.923                | 99.49           |
|                                | Medaka        | 0.8         | 99.12                    | 134.25               | <b>279</b>              | 93.135                | 99.83           |
|                                | MarginPolish  | 0.8         | <b>87.31</b>             | <b>124.59</b>        | 368                     | <b>94.361</b>         | <b>99.84</b>    |
|                                | HELEN         | 0.8         | 87.45                    | 178.4                | 1403                    | 94.344                | 99.67           |
|                                | NeuralPolish  | 0.8         | 134.82                   | 355.15               | 305                     | 94.148                | 99.54           |
| <i>NAI2878</i><br><i>chr21</i> | Flye          | 3.7         | 428.42                   | 1890.74              | 13425                   | 87.289                | 97.12           |
|                                | Racon         | 3.7         | 372.63                   | 1852.24              | 13057                   | 87.751                | 97.15           |
|                                | Medaka        | 3.7         | <b>343.77</b>            | 1565.97              | 12770                   | <b>88.378</b>         | 97.49           |
|                                | MarginPolish* | 3.7         | 293.86                   | 1328.66              | 12995                   | 1.149                 | 97.77           |
|                                | HELEN*        | 3.1         | 885.46                   | 707.79               | 120                     | 0.032                 | 97.77           |
|                                | NeuralPolish  | 3.7         | 359.56                   | <b>1004.22</b>       | <b>10102</b>            | 88.139                | <b>98.31</b>    |
| <i>NAI2878</i><br><i>chr20</i> | Flye          | 8.7         | 322.12                   | 1995.33              | 24798                   | 92.866                | 96.96           |
|                                | Racon         | 8.7         | <b>295.16</b>            | 1912.53              | 23895                   | 92.993                | 97.02           |
|                                | Medaka        | 8.8         | 359.29                   | 1636.96              | 23803                   | 93.88                 | 97.36           |
|                                | MarginPolish* | 8.8         | 275.56                   | 1388.23              | 24753                   | 1.979                 | 97.68           |
|                                | HELEN*        | 7.1         | 917.36                   | 1938.98              | 99                      | 0.008                 | 96.18           |
|                                | NeuralPolish  | 8.9         | 301.35                   | <b>1033.24</b>       | <b>18685</b>            | <b>94.387</b>         | <b>98.23</b>    |
| <i>A. thaliana</i>             | Flye          | 13.2        | 1332.57                  | 1448.7               | 45508                   | 88.633                | 97.18           |
|                                | Racon         | 13.2        | 1249.91                  | 1287.21              | 45548                   | 89.158                | 97.33           |
|                                | Medaka        | 13.2        | 1113.78                  | 1070.79              | 45243                   | 90.173                | 97.62           |
|                                | MarginPolish  | 13.2        | <b>1062.12</b>           | 1096.03              | 46309                   | 89.784                | 97.68           |
|                                | HELEN         | 13          | 2576.23                  | 1492.56              | 53361                   | 78.047                | 96.8            |
|                                | NeuralPolish  | 13.3        | 1052.42                  | <b>930.5</b>         | <b>39247</b>            | <b>90.408</b>         | <b>97.92</b>    |

The results marked with \* have no comparative meaning. Because the indicators are calculated according to the contig sequences which align to the reference, and there are very few contig sequences aligning to the reference in these results.

**Table S4.** Quast evaluation of polishing results by Racon, Medaka, MarginPolish, HELEN and NeuralPolish on the data assembled by Wtdbg2.

| dataset                        | tools        | N50<br>(Mb) | mismatches<br>per 100kbp | indels<br>per 100kbp | number of<br>indels>5bp | genome<br>fraction(%) | Identity<br>(%) |
|--------------------------------|--------------|-------------|--------------------------|----------------------|-------------------------|-----------------------|-----------------|
| <i>E. coli</i>                 | Wtdbg2       | 4.6         | 66.85                    | 296.06               | 1                       | 99.996                | 99.62           |
|                                | Racon        | 4.6         | 104.95                   | 213.86               | 31                      | 99.995                | 99.61           |
|                                | Medaka       | 4.6         | 132.33                   | <b>112.16</b>        | <b>0</b>                | 99.995                | 99.75           |
|                                | MarginPolish | 4.6         | 101.56                   | 149.73               | 6                       | <b>99.998</b>         | 99.73           |
|                                | HELEN        | 4.6         | 90.90                    | 158.89               | 13                      | <b>99.998</b>         | 99.71           |
|                                | NeuralPolish | 4.6         | <b>57.29</b>             | 132.24               | 10                      | 99.997                | <b>99.78</b>    |
| <i>S. cerevisiae</i>           | Wtdbg2       | 0.8         | 115.17                   | 514.81               | 397                     | 97.325                | 99.34           |
|                                | Racon        | 0.8         | 149.64                   | 351.62               | 616                     | 97.167                | 99.49           |
|                                | Medaka       | 0.8         | 102.46                   | 134.6                | <b>330</b>              | 97.409                | <b>99.83</b>    |
|                                | MarginPolish | 0.8         | <b>91.28</b>             | <b>128.05</b>        | 435                     | 97.383                | <b>99.83</b>    |
|                                | HELEN        | 0.8         | 94.45                    | 184.28               | 1491                    | <b>97.448</b>         | 99.66           |
|                                | NeuralPolish | 0.8         | 114.33                   | 360.79               | 353                     | 97.405                | 99.55           |
| <i>NAI2878</i><br><i>chr21</i> | Wtdbg2       | 4.3         | <b>200.30</b>            | 2942.30              | 7759                    | 52.351                | 96.42           |
|                                | Racon        | 4.3         | 907.78                   | 1706.41              | 13973                   | 85.830                | 97.14           |
|                                | Medaka       | 4.4         | 782.87                   | 1469.07              | 13574                   | 86.347                | 97.43           |
|                                | MarginPolish | 4.3         | 928.22                   | 1408.48              | 15511                   | 84.998                | 97.34           |
|                                | HELEN*       | 4.1         | 864.27                   | 1658.23              | 250                     | 6.286                 | 96.67           |
|                                | NeuralPolish | 4.4         | 552.09                   | <b>961.26</b>        | <b>10570</b>            | <b>86.798</b>         | <b>98.23</b>    |
| <i>NAI2878</i><br><i>chr20</i> | Wtdbg2       | 0.5         | 700.11                   | 2317.86              | 11208                   | 55.510                | 96.37           |
|                                | Racon        | 0.5         | <b>318.53</b>            | 1853.13              | 23915                   | 92.477                | 97.04           |
|                                | Medaka       | 14          | 356.22                   | 1679.48              | 23723                   | 92.566                | 97.31           |
|                                | MarginPolish | 0.5         | 953.89                   | 1479.41              | 28622                   | 90.585                | 97.15           |
|                                | HELEN*       | 0.5         | 768.34                   | 1689.86              | 239                     | 5.440                 | 96.52           |
|                                | NeuralPolish | 0.5         | 556.65                   | <b>1024.25</b>       | <b>20308</b>            | <b>93.574</b>         | <b>98.12</b>    |
| <i>A. thaliana</i>             | Wtdbg2       | 9.8         | 1545.41                  | 1965.26              | 29724                   | 55.628                | 96.61           |
|                                | Racon        | 10.0        | 1094.28                  | 1200.97              | 35032                   | 72.762                | 97.47           |
|                                | Medaka       | 10.0        | <b>1020.58</b>           | 979.02               | 34228                   | 73.754                | 97.75           |
|                                | MarginPolish | 10.0        | 1263.31                  | 1253.93              | 38301                   | 68.692                | 97.21           |
|                                | HELEN        | 9.7         | 731                      | 1598.33              | 18190                   | 68.692                | 96.27           |
|                                | NeuralPolish | 10.0        | 1105.95                  | <b>849.23</b>        | <b>29575</b>            | <b>74.009</b>         | <b>97.91</b>    |

The results marked with \* have no comparative meaning. Because the indicators are calculated according to the contig sequences which align to the reference, and there are very few contig sequences aligning to the reference in these results.

**Table S5.** Quast evaluation of polishing results by Racon, Medaka, MarginPolish, HELEN and NeuralPolish on the data assembled by Canu.

| dataset                        | tools        | N50<br>(Mb) | mismatches<br>per 100kbp | indels<br>per 100kbp | number of<br>indels>5bp | genome<br>fraction(%) | Identity<br>(%) |
|--------------------------------|--------------|-------------|--------------------------|----------------------|-------------------------|-----------------------|-----------------|
| <i>E. coli</i>                 | Canu         | 4.7         | 99.84                    | 280.25               | 4                       | 99.998                | 99.60           |
|                                | Racon        | 4.7         | 110.35                   | 213.51               | 57                      | 99.998                | 99.62           |
|                                | Medaka       | 4.7         | 136.68                   | <b>116</b>           | <b>3</b>                | 99.998                | 99.75           |
|                                | MarginPolish | 4.7         | 112.83                   | 169.19               | 20                      | 99.998                | 99.72           |
|                                | HELEN        | 4.7         | 112.66                   | 191.14               | 24                      | 99.976                | 99.72           |
|                                | NeuralPolish | 4.7         | <b>64.76</b>             | 133.86               | 7                       | 99.998                | <b>99.78</b>    |
| <i>S. cerevisiae</i>           | Canu         | 0.8         | 116.93                   | 504.53               | 732                     | 99.153                | 99.39           |
|                                | Racon        | 0.8         | 164.12                   | 386.36               | 717                     | 99.044                | 99.49           |
|                                | Medaka       | 0.8         | 119.26                   | 156.87               | <b>435</b>              | 99.133                | <b>99.83</b>    |
|                                | MarginPolish | 0.8         | 122.6                    | <b>153.93</b>        | 564                     | 98.914                | <b>99.83</b>    |
|                                | HELEN        | 0.8         | <b>113.06</b>            | 200.81               | 1536                    | 98.166                | 99.67           |
|                                | NeuralPolish | 0.8         | 147.55                   | 404.23               | 496                     | <b>99.160</b>         | 99.55           |
| <i>NAI2878</i><br><i>chr21</i> | Canu         | 1.1         | 969.55                   | 2149.83              | 14304                   | 65.860                | 96.18           |
|                                | Racon        | 1.1         | <b>288.32</b>            | 1882.49              | 12441                   | 85.361                | 97.15           |
|                                | Medaka       | 1.1         | 338.33                   | 1608.22              | 12271                   | 85.906                | 97.45           |
|                                | MarginPolish | 1.1         | 360.27                   | 1515.52              | 15659                   | 84.932                | 97.31           |
|                                | HELEN*       | 1.0         | 1022.92                  | 264.87               | 169                     | 6.419                 | 96.71           |
|                                | NeuralPolish | 1.1         | 327.17                   | <b>1056.99</b>       | <b>9995</b>             | <b>86.252</b>         | <b>98.22</b>    |
| <i>NAI2878</i><br><i>chr20</i> | Canu         | 0.6         | 954.41                   | 1973.19              | 17922                   | 57.831                | 96.10           |
|                                | Racon        | 0.6         | <b>265.66</b>            | 1951.28              | 21889                   | 88.686                | 97.06           |
|                                | Medaka       | 0.6         | 322.76                   | 1676.24              | 21530                   | 89.399                | 97.35           |
|                                | MarginPolish | 0.6         | 364.57                   | 1589.62              | 27824                   | 87.557                | 97.14           |
|                                | HELEN*       | 0.6         | 997.66                   | 32.98                | 41                      | 5.159                 | 96.42           |
|                                | NeuralPolish | 0.6         | 304.71                   | <b>1092.18</b>       | <b>17467</b>            | <b>89.527</b>         | <b>98.15</b>    |
| <i>A. thaliana</i>             | Canu         | 4.0         | 1367.31                  | 1787.24              | 43584                   | 63.020                | 96.48           |
|                                | Racon        | 4.0         | 1099.75                  | 1204.75              | 34693                   | 71.429                | 97.48           |
|                                | Medaka       | 4.1         | <b>1018.12</b>           | 979.14               | 33814                   | 72.332                | 97.75           |
|                                | MarginPolish | 4.0         | 1082.91                  | 1113.64              | 39469                   | 70.450                | 97.41           |
|                                | HELEN*       | 4.0         | 1511.36                  | 1406.54              | 37874                   | 56.094                | 96.64           |
|                                | NeuralPolish | 4.1         | 1079.65                  | <b>854.46</b>        | <b>29608</b>            | <b>72.910</b>         | <b>97.91</b>    |

The results marked with \* have no comparative meaning. Because the indicators are calculated according to the contig sequences which align to the reference, and there are very few contig sequences aligning to the reference in these results.

**Table S6.** Iteration polishing of NeuralPolish on the draft assembly from *E. coli*, *S. cerevisiae*, chromosome 21 of NA12878, chromosome 20 of NA12878 and *A. thaliana* dataset.

| Dataset              | Rounds          | Mismatch (%) | Deletion (%) | Insertion (%) | overall error rate (%) |
|----------------------|-----------------|--------------|--------------|---------------|------------------------|
| <i>E. coli</i>       | NeuralPolish x1 | 0.07%        | 0.12%        | 0.07%         | 0.26%                  |
|                      | NeuralPolish x2 | 0.06%        | 0.12%        | 0.07%         | <b>0.25%</b>           |
|                      | NeuralPolish x3 | 0.06%        | 0.12%        | 0.07%         | 0.25%                  |
|                      | NeuralPolish x4 | 0.06%        | 0.13%        | 0.07%         | 0.26%                  |
| <i>S. cerevisiae</i> | NeuralPolish x1 | 0.11%        | 0.71%        | 0.56%         | <b>1.37%</b>           |
|                      | NeuralPolish x2 | 0.11%        | 0.71%        | 0.58%         | 1.40%                  |
|                      | NeuralPolish x3 | 0.11%        | 0.71%        | 0.57%         | 1.38%                  |
|                      | NeuralPolish x4 | 0.11%        | 0.71%        | 0.57%         | 1.38%                  |
| NA12878 chr21        | NeuralPolish x1 | 0.44%        | 1.59%        | 0.57%         | 2.60%                  |
|                      | NeuralPolish x2 | 0.42%        | 1.55%        | 0.59%         | 2.55%                  |
|                      | NeuralPolish x3 | 0.42%        | 1.53%        | 0.58%         | <b>2.53%</b>           |
|                      | NeuralPolish x4 | 0.42%        | 1.54%        | 0.58%         | 2.54%                  |
| NA12878 chr20        | NeuralPolish x1 | 0.33%        | 1.60%        | 0.51%         | 2.43%                  |
|                      | NeuralPolish x2 | 0.33%        | 1.57%        | 0.53%         | 2.43%                  |
|                      | NeuralPolish x3 | 0.33%        | 1.56%        | 0.54%         | 2.43%                  |
|                      | NeuralPolish x4 | 0.32%        | 1.55%        | 0.53%         | <b>2.41%</b>           |
| <i>A. thaliana</i>   | NeuralPolish x1 | 0.73%        | 2.98%        | 2.36%         | 6.06%                  |
|                      | NeuralPolish x2 | 0.72%        | 2.93%        | 2.36%         | 6.01%                  |
|                      | NeuralPolish x3 | 0.72%        | 2.96%        | 2.35%         | 6.03%                  |
|                      | NeuralPolish x4 | 0.72%        | 2.90%        | 2.34%         | <b>5.95%</b>           |

**Table S7.** The runtime of each polishing methods on the test data sets.

| Datasets             | Polishing tools | CPU runtimes(sec) | GPU runtimes(sec) | Total runtimes(sec) |
|----------------------|-----------------|-------------------|-------------------|---------------------|
| <i>E. coli</i>       | Racon           | 898               | 0                 | 898                 |
|                      | Medaka          | 898               | 326               | 1224                |
|                      | MarginPolish    | 954               | 0                 | 954                 |
|                      | HELEN           | 954               | 108               | 1062                |
|                      | NeuralPolish    | 574               | 213               | <b>787</b>          |
| <i>S. cerevisiae</i> | Racon           | 4121              | 0                 | 4121                |
|                      | Medaka          | 4121              | 692               | 4813                |
|                      | MarginPolish    | 4595              | 0                 | 4595                |
|                      | HELEN           | 4595              | 233               | 4828                |
|                      | NeuralPolish    | 2031              | 500               | <b>2531</b>         |
| <i>NA12878 chr21</i> | Racon           | 326               | 0                 | <b>326</b>          |
|                      | Medaka          | 326               | 579               | 905                 |
|                      | MarginPolish    | 1408              | 0                 | 1408                |
|                      | HELEN           | 1408              | 182               | 1590                |
|                      | NeuralPolish    | 420               | 1538              | 1958                |
| <i>NA12878 chr20</i> | Racon           | 702               | 0                 | <b>702</b>          |
|                      | Medaka          | 702               | 903               | 1605                |
|                      | MarginPolish    | 2333              | 0                 | 2333                |
|                      | HELEN           | 2333              | 230               | 2563                |
|                      | NeuralPolish    | 984               | 2560              | 3544                |
| <i>A. thaliana</i>   | Racon           | 1235              | 0                 | <b>1235</b>         |
|                      | Medaka          | 1235              | 1905              | 3140                |
|                      | MarginPolish    | 12066             | 0                 | 12066               |
|                      | HELEN           | 12066             | 1194              | 13260               |
|                      | NeuralPolish    | 1777              | 5757              | 7534                |

## Supplementary Figures

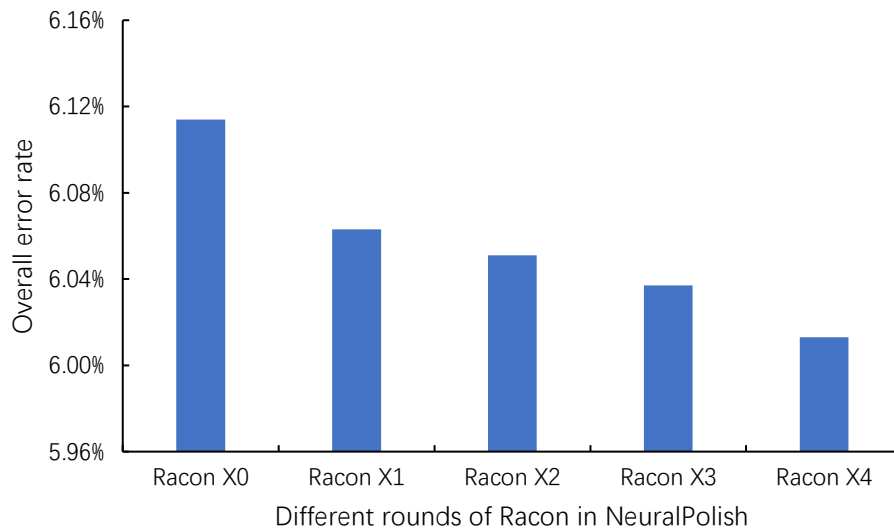

**Fig. S1.** Evaluation of different rounds of Racon in NeuralPolish. The draft assembly is assembled from *A. thaliana* by Flye. We perform different rounds of Racon to polish the draft assembly initially and then obtain the final polished result by NeuralPolish. The NeuralPolish model is trained on the dataset assembled by Wtdbg2. NeuralPolish with one round of Racon can significantly reduce the error rate of the polishing result than NeuralPolish without Racon. More rounds of Racon in NeuralPolish can further reduce the error rate, but they also bring more computational expense.

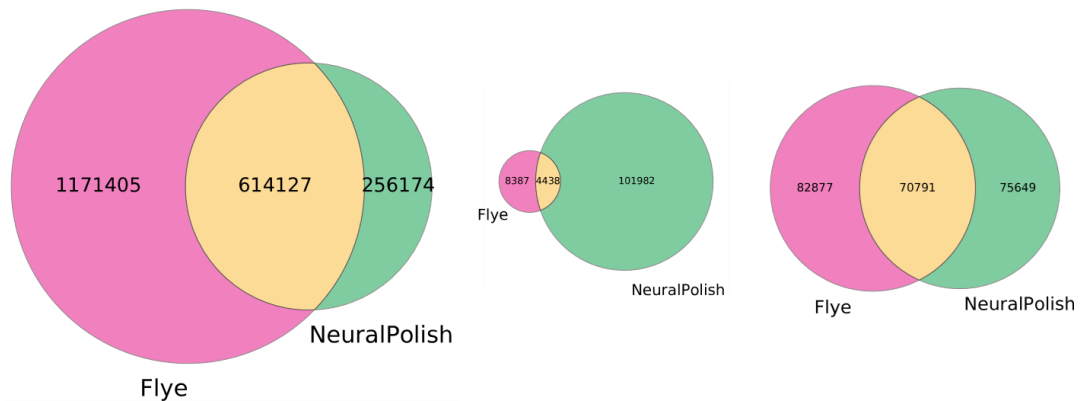

**Fig. S2.** Comparing the draft assembly and polished assembly of chromosome 20 of NA12878 in terms of the error sites. The left one presents the deletion errors in the draft assembly and polished assembly. The middle one presents the insertion errors and the right one shows the substitution errors.



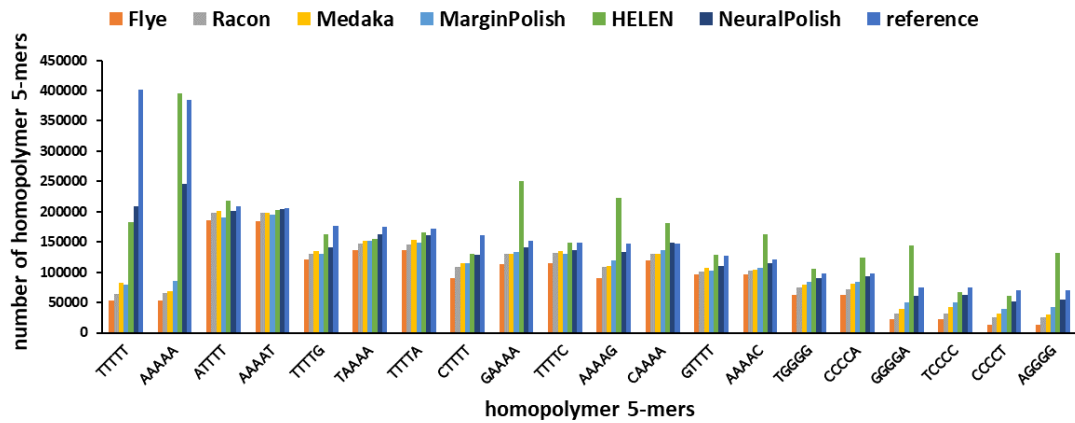

**Fig. S3.** Comparison of the homopolymer 5-mers counts in the polished genome assembly and reference genome on the dataset of chromosome 20 of NA12878. The draft assembly is produced by assembler Flye and then polished by Racon, Medaka, MarginPolish, HELEN and NeuralPolish, respectively. The homopolymer 5-mers consists of a single base (*e.g.* AAAAA) or 4-base stretch of a single base (*e.g.* AAAAT) are picked. The 5-mers are sorted by the counts in the reference genome.

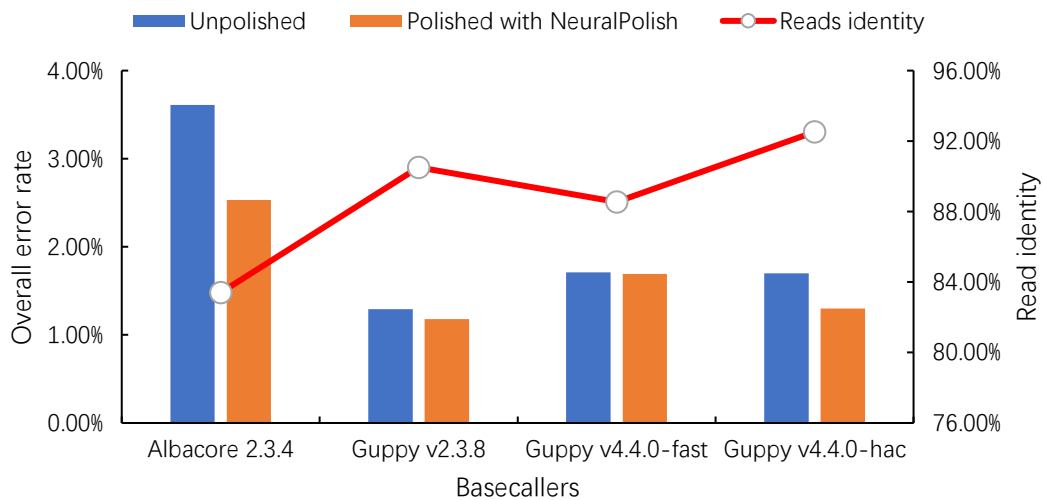

**Fig. S4.** The error rates of polished assemblies by NeuralPolish on the datasets with varying degree of errors. The read sets were basecalled by several basecallers and the assemblies were assembled using Flye. The red polyline shows the identities of reads sets.
